# Supplementary material for: Mitochondrial haplogroup M contributes to asthma risk in the Kuwaiti population
Source: Front Allergy. 2025 Aug 8;6:1618964. doi: 10.3389/falgy.2025.1618964 (PMC12370696; doi:10.3389/falgy.2025.1618964)
Supplement: Supplementary file 2 [file Table2.xlsx]

## Sheet: Sheet1
Supplementary Table 2. Sensitivity analysis using Firth logistic regression for mitochondrial variants associated with asthma.
#CHROM	POS	ID	REF	ALT	PROVISIONAL_REF?	A1	OMITTED	A1_FREQ	TEST	OBS_CT	OR	LOG(OR)_SE	L95	U95	Z_STAT	P	FIRTH?
MT	16359	rs370567324	T	C	Y	C	T	0.0139373	ADD	287	28.0728	1.1932	2.70789	291.032	2.79483	0.00519263	N
MT	15043	rs28357684	G	A	Y	A	G	0.0609756	ADD	287	3.844	0.552253	1.30228	11.3465	2.43822	0.0147599	N
MT	7853	rs199751156	G	A	Y	A	G	0.013986	ADD	286	18.419	1.21414	1.70524	198.952	2.39954	0.0164158	N
MT	14783	rs28357680	T	C	Y	C	T	0.0524476	ADD	286	3.53754	0.574177	1.14805	10.9004	2.20042	0.0277769	N
MT	12403	MT:12403	C	T	Y	T	C	0.0173611	ADD	288	8.56325	0.982916	1.24732	58.7893	2.1848	0.0289032	N
MT	6446	MT:6446	G	A	Y	A	G	0.0176056	ADD	284	8.56508	0.984762	1.24308	59.0149	2.18093	0.0291888	N
MT	14110	MT:14110	T	C	Y	C	T	0.0174825	ADD	286	8.50393	0.981976	1.24097	58.2746	2.17982	0.0292709	N
MT	10400	rs28358278	C	T	Y	T	C	0.0530035	ADD	283	3.49365	0.574712	1.13262	10.7764	2.17665	0.0295066	N
MT	16248	MT:16248	C	T	Y	T	C	0.0174216	ADD	287	7.34287	0.957114	1.12504	47.925	2.08306	0.0372454	N
